# Supplementary material for: High-efficiency radon adsorption by nickel nanoparticles supported on activated carbon
Source: Royal Society of Chemistry journal article supplement (doi:10.1039/d2nj00862a), 2022-01-01
Supplement: d2nj00862a1.pdf [file d2nj00862a1.pdf]

## Supplementary Information

### High-efficiency Radon Adsorption by Nickel Nanoparticles Supported on Activated Carbon

Xiangyuan Deng<sup>a,b,c</sup>, Bo Yu<sup>a,b</sup>, Haibiao Wu<sup>a,b</sup>, Zhengzhong He<sup>a,b</sup>, Meng Wang<sup>a,\*</sup>, Detao Xiao<sup>a,b,\*</sup>

<sup>a</sup> School of Nuclear Science and Technology, University of South China, Hengyang 421001, Hunan, China.

<sup>b</sup> Radon Key Laboratory of Hunan Province, University of South China, Hengyang 421001, Hunan, China.

<sup>c</sup> School of Mathematics and Physics, University of South China, Hengyang 421001, Hunan, China.

\* Corresponding authors.

E-mail address: [wmeng020321@163.com](mailto:wmeng020321@163.com) (Meng Wang), [xiaodt@usc.edu.cn](mailto:xiaodt@usc.edu.cn) (Detao Xiao).

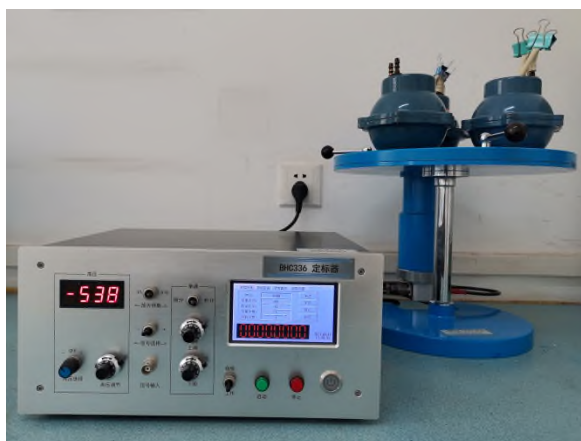

Fig. S1. Adsorption test instruments.

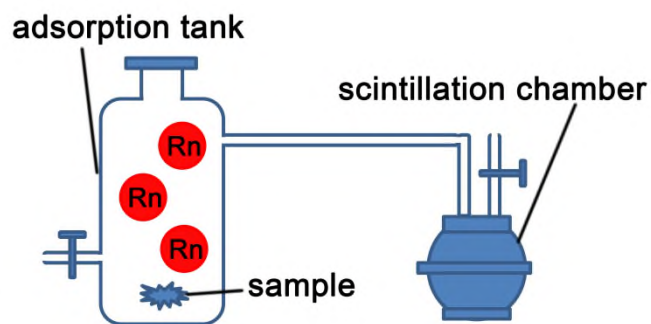

Fig. S2. Adsorption test diagram

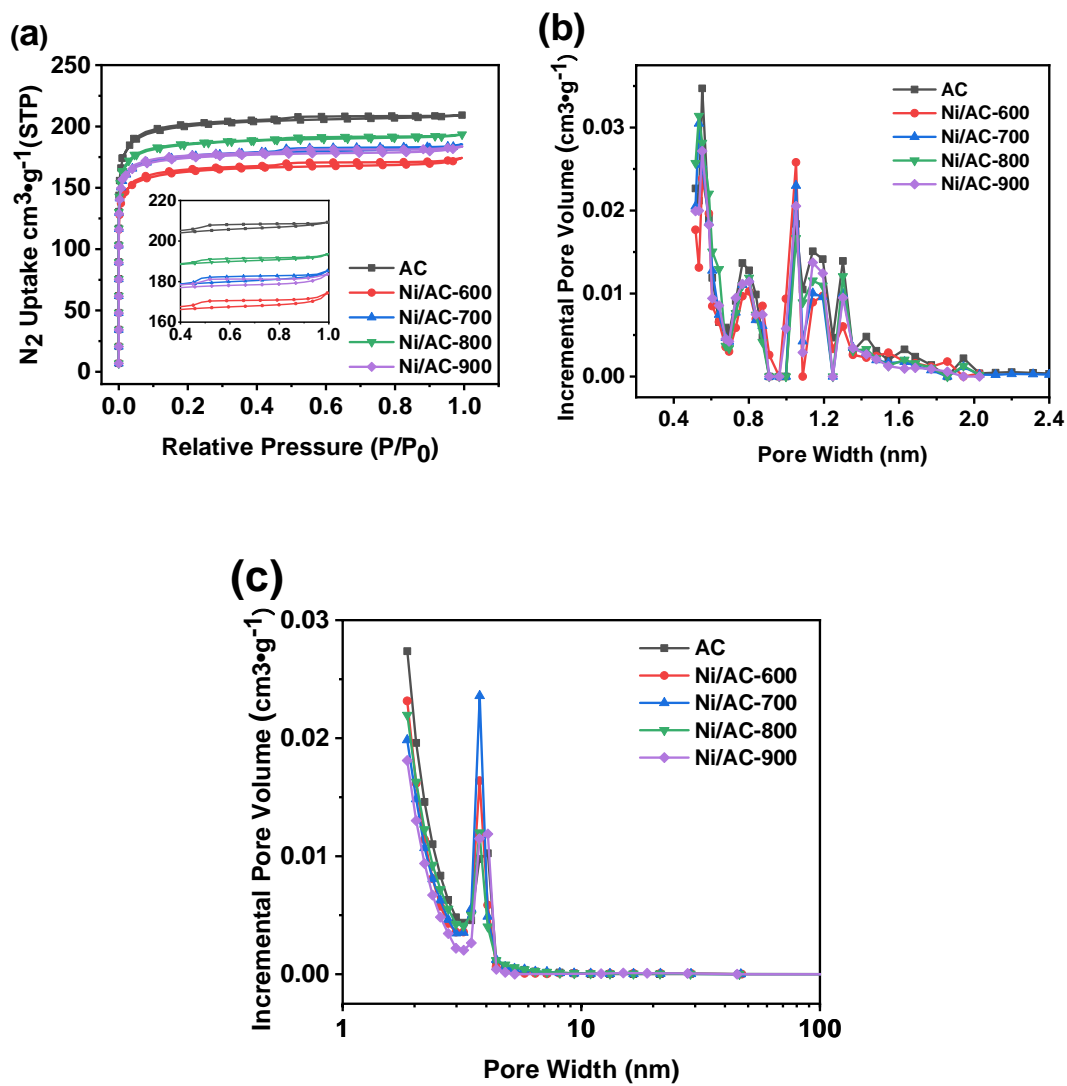

Fig. S3. (a)  $N_2$  adsorption-desorption isotherms; (b) Micropore distribution; (c) Mesopore distribution.

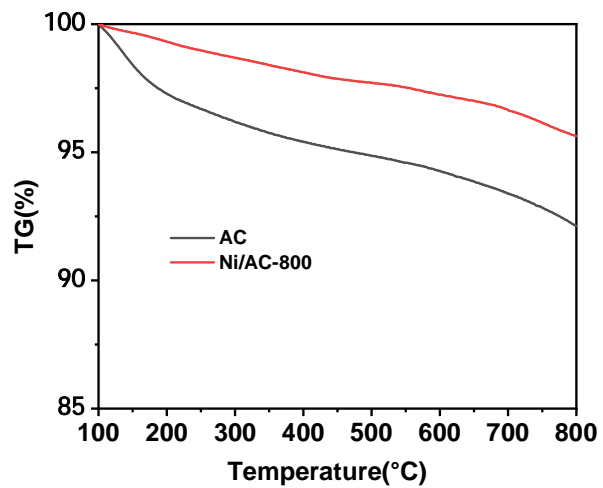

Fig. S4. TG curves of Ni/AC-800 and AC.

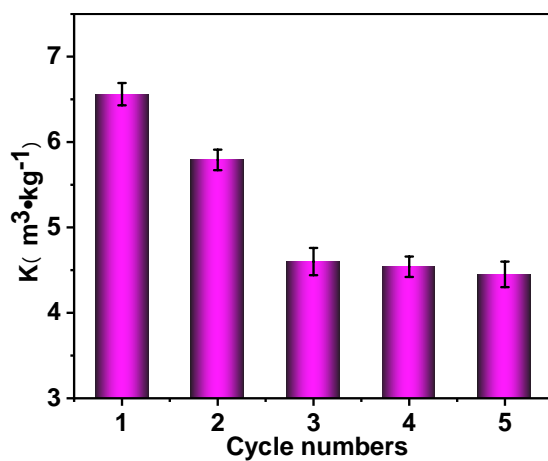

Fig. S5. Rn absorption of samples heated and regenerated in air.

**Table S1.**

Structural parameters of all obtained samples.

| Samples   | BET surface<br>area ( $\text{m}^2 \cdot \text{g}^{-1}$ ) | Area of                                           | Total pore                                  | Micropore                                   | $S_{\text{micro}}/S_{\text{BET}}$<br>(%) |
|-----------|----------------------------------------------------------|---------------------------------------------------|---------------------------------------------|---------------------------------------------|------------------------------------------|
|           |                                                          | micropore<br>( $\text{m}^2 \cdot \text{g}^{-1}$ ) | volume( $\text{cm}^3 \cdot \text{g}^{-1}$ ) | volume( $\text{cm}^3 \cdot \text{g}^{-1}$ ) |                                          |
| AC        | 662.45                                                   | 572.96                                            | 0.324                                       | 0.270                                       | 83.33                                    |
| Ni/AC-600 | 541.22                                                   | 464.72                                            | 0.270                                       | 0.218                                       | 80.74                                    |
| Ni/AC-700 | 579.75                                                   | 509.72                                            | 0.287                                       | 0.240                                       | 83.62                                    |
| Ni/AC-800 | 611.50                                                   | 536.75                                            | 0.300                                       | 0.254                                       | 84.67                                    |
| Ni/AC-900 | 575.64                                                   | 512.82                                            | 0.284                                       | 0.242                                       | 85.21                                    |

**Table S2.**

Rn adsorption properties of samples at different temperatures.

| Test temperature ( $^{\circ}\text{C}$ ) | Adsorption coefficient ( $\text{m}^3 \cdot \text{kg}^{-1}$ ) |           |           |           |           |
|-----------------------------------------|--------------------------------------------------------------|-----------|-----------|-----------|-----------|
|                                         | AC                                                           | Ni/AC-600 | Ni/AC-700 | Ni/AC-800 | Ni/AC-900 |
| 20                                      | 5.39±0.11                                                    | 6.61±0.15 | 7.03±0.11 | 8.01±0.13 | 7.26±0.13 |
| 25                                      | 4.43±0.13                                                    | 5.42±0.13 | 5.77±0.10 | 6.56±0.14 | 5.97±0.12 |
| 30                                      | 3.36±0.10                                                    | 4.35±0.13 | 5.01±0.13 | 5.49±0.10 | 5.25±0.15 |

**Table S3.**Analysis of the valence of nickel on the surface of Ni/AC-800 heated at 120 $^{\circ}\text{C}$  for 8 h.

| Samples      | Ni <sup>0</sup> (%) | Ni <sup>2+</sup> (%) | Ni <sup>3+</sup> (%) |
|--------------|---------------------|----------------------|----------------------|
| Ni/AC-800    | 27.0                | 59.5                 | 13.5                 |
| Ni/AC-800-1* | 20.9                | 57.6                 | 21.5                 |

\*Ni/AC-800-1 heated and regenerated in air
